# Supplementary material for: Genetic variation and heritability of grain protein deviation in European wheat genotypes
Source: PubMed Central journal article supplement (PMC7397848; doi:10.1016/j.fcr.2020.107896), 2020-09-15

**grainN vs yield  
2016\_Ag**

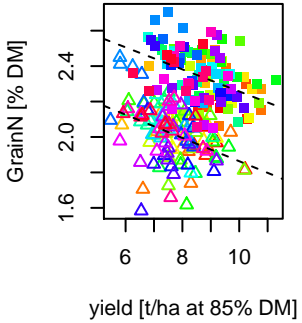

**grainN\_corrN vs yield\_corrN  
2016\_Ag**

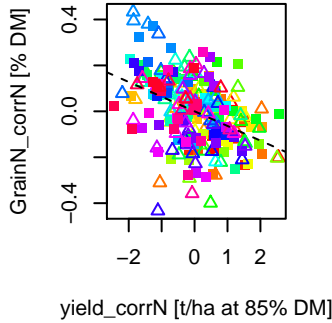

**GPD vs yield\_corrN  
2016\_Ag**

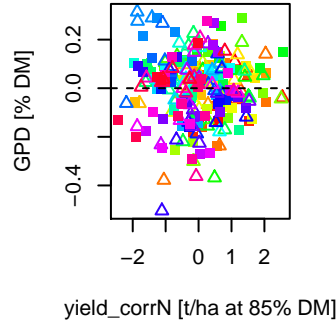

**GPD vs Grain\_corrN  
2016\_Ag**

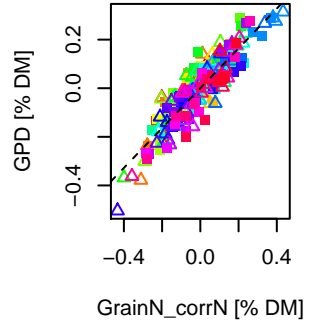

**2016\_Ag  
grainN\_corrN**

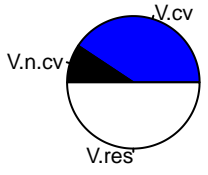

**2016\_Ag  
Yield\_corrN**

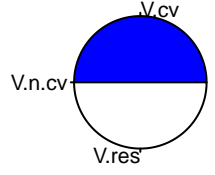

**2016\_Ag  
GPD**

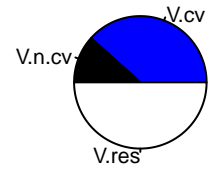

**grainN vs yield  
2016\_Kw**

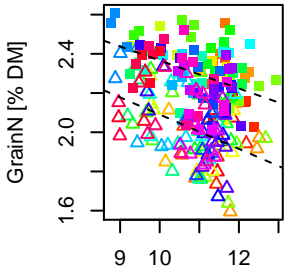

yield [t/ha at 85% DM]

**grainN\_corrN vs yield\_corrN  
2016\_Kw**

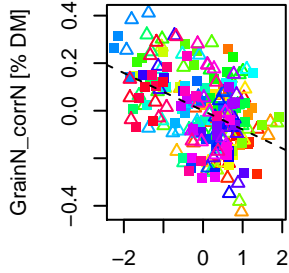

yield\_corrN [t/ha at 85% DM]

**GPD vs yield\_corrN  
2016\_Kw**

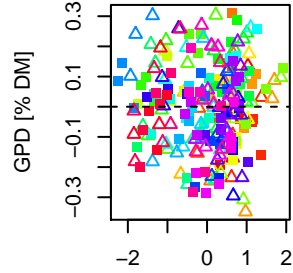

yield\_corrN [t/ha at 85% DM]

**GPD vs Grain\_corrN  
2016\_Kw**

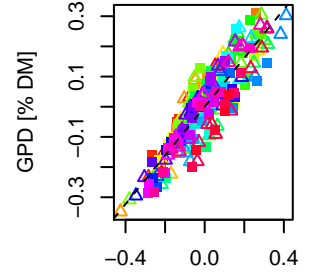

GrainN\_corrN [% DM]

**2016\_Kw  
grainN\_corrN**

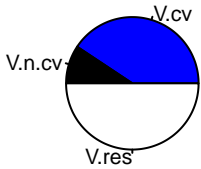

**2016\_Kw  
Yield\_corrN**

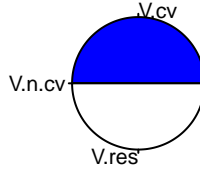

**2016\_Kw  
GPD**

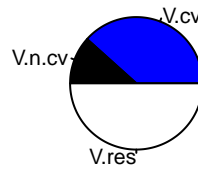

**grainN vs yield  
2016\_Li**

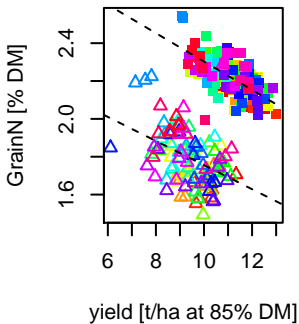

**grainN\_corrN vs yield\_corrN  
2016\_Li**

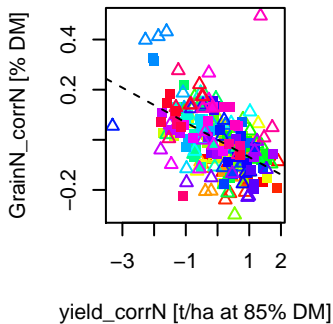

**GPD vs yield\_corrN  
2016\_Li**

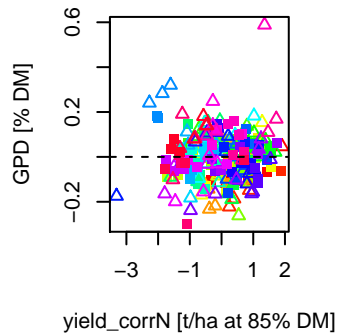

**GPD vs Grain\_corrN  
2016\_Li**

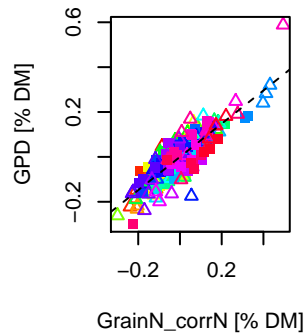

**2016\_Li  
grainN\_corrN**

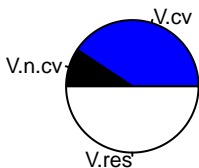

**2016\_Li  
Yield\_corrN**

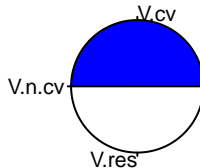

**2016\_Li  
GPD**

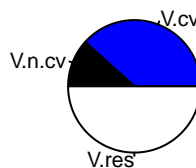

**grainN vs yield  
2016\_Ro**

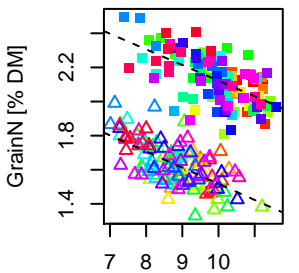

yield [t/ha at 85% DM]

**grainN\_corrN vs yield\_corrN  
2016\_Ro**

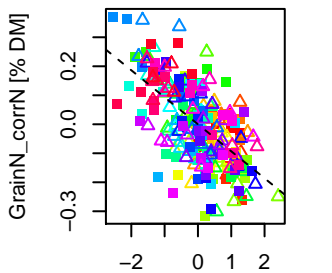

yield\_corrN [t/ha at 85% DM]

**GPD vs yield\_corrN  
2016\_Ro**

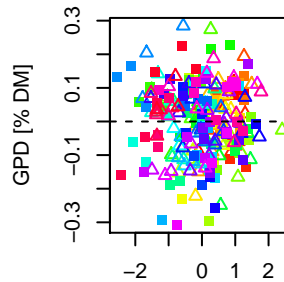

yield\_corrN [t/ha at 85% DM]

**GPD vs Grain\_corrN  
2016\_Ro**

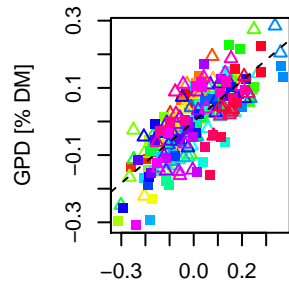

GrainN\_corrN [% DM]

**2016\_Ro  
grainN\_corrN**

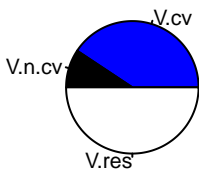

**2016\_Ro  
Yield\_corrN**

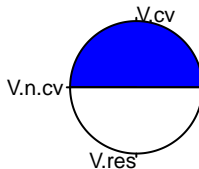

**2016\_Ro  
GPD**

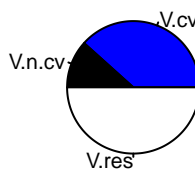

**grainN vs yield**  
**2016\_Sa**

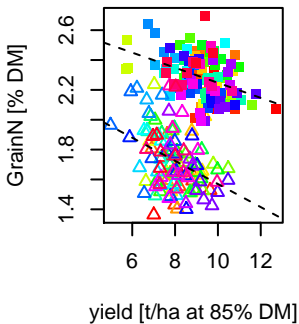

**grainN\_corrN vs yield\_corrN**  
**2016\_Sa**

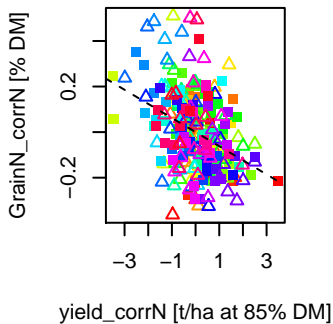

**GPD vs yield\_corrN**  
**2016\_Sa**

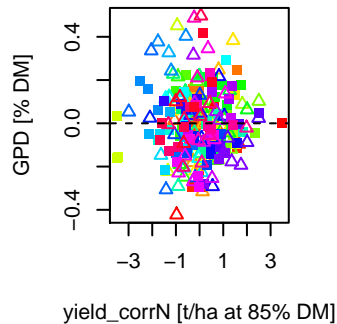

**GPD vs Grain\_corrN**  
**2016\_Sa**

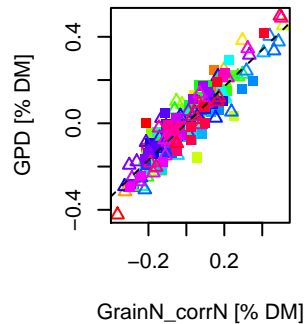

**2016\_Sa**  
**grainN\_corrN**



**2016\_Sa**  
**Yield\_corrN**

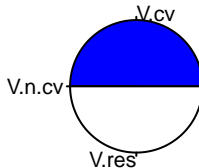

**2016\_Sa**  
**GPD**

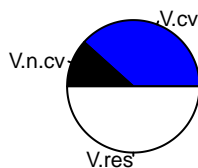

**grainN vs yield  
2017\_Ag**

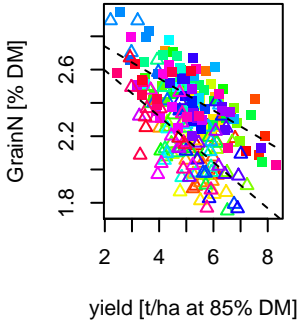

**grainN\_corrN vs yield\_corrN  
2017\_Ag**

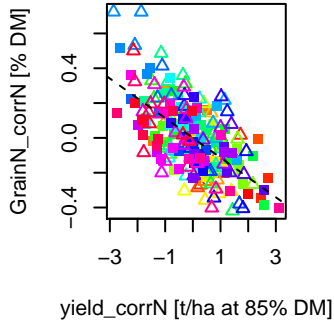

**GPD vs yield\_corrN  
2017\_Ag**

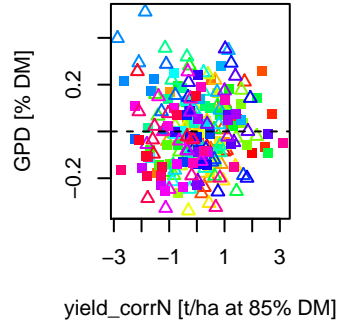

**GPD vs Grain\_corrN  
2017\_Ag**

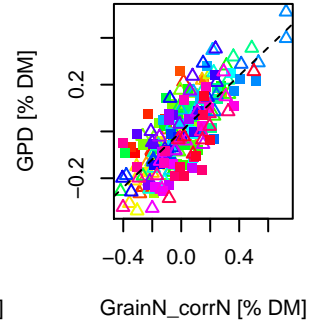

**2017\_Ag  
grainN\_corrN**

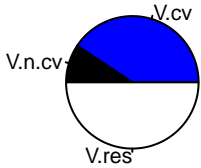

**2017\_Ag  
Yield\_corrN**

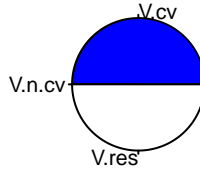

**2017\_Ag  
GPD**

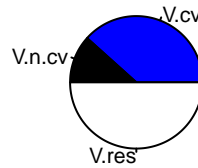

**grainN vs yield  
2017\_Li**

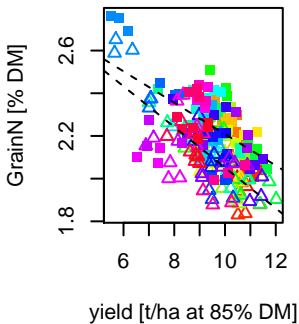

**grainN\_corrN vs yield\_corrN  
2017\_Li**

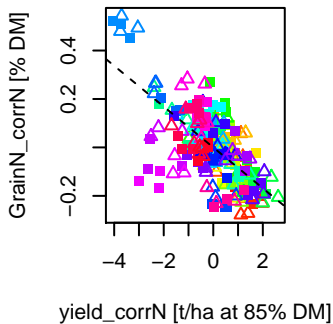

**GPD vs yield\_corrN  
2017\_Li**

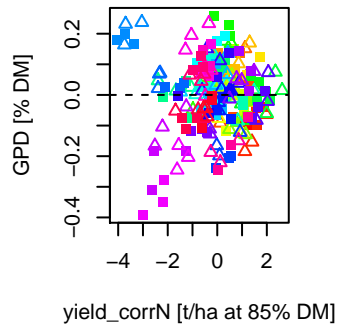

**GPD vs Grain\_corrN  
2017\_Li**

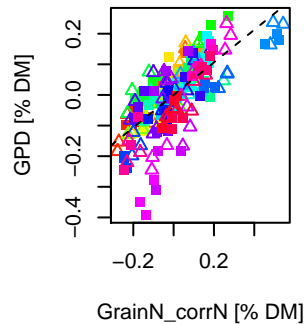

**2017\_Li  
grainN\_corrN**



**2017\_Li  
Yield\_corrN**



**2017\_Li  
GPD**

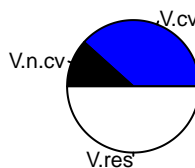

**grainN vs yield  
2017\_Ro**

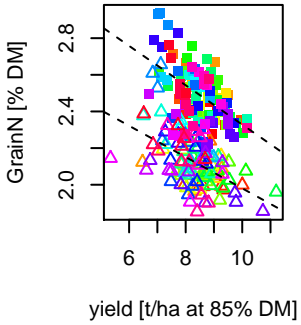

**grainN\_corrN vs yield\_corrN  
2017\_Ro**

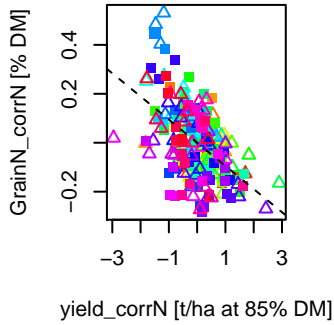

**GPD vs yield\_corrN  
2017\_Ro**

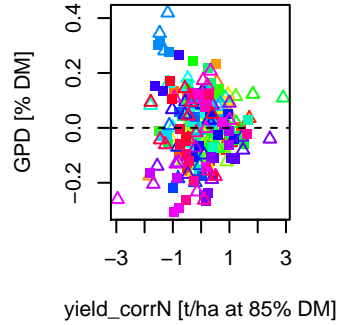

**GPD vs Grain\_corrN  
2017\_Ro**

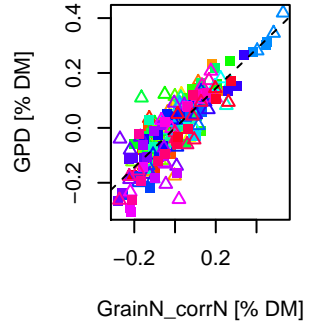

**2017\_Ro  
grainN\_corrN**



**2017\_Ro  
Yield\_corrN**



**2017\_Ro  
GPD**

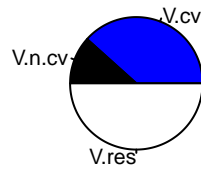



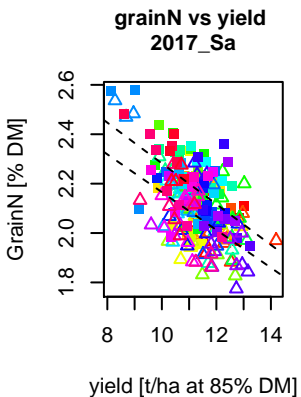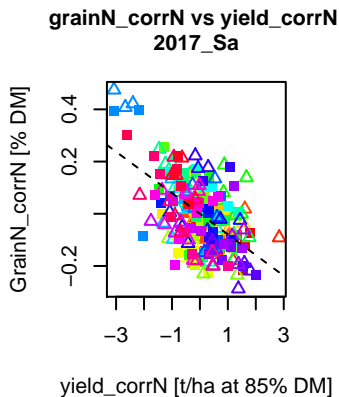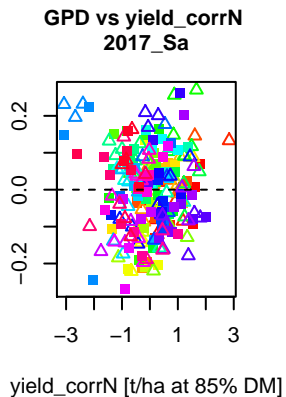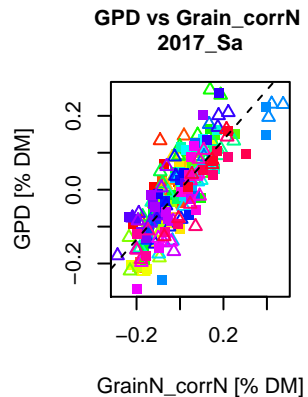

**2017\_Sa**  
**grainN\_corrN**

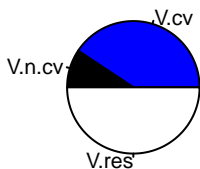

**2017\_Sa**  
**Yield\_corrN**

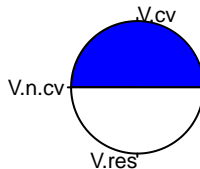

**2017\_Sa**  
**GPD**

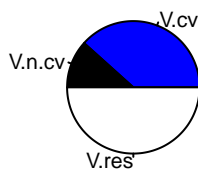

**grainN vs yield  
2018\_Ag**

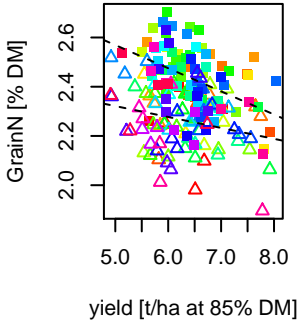

**grainN\_corrN vs yield\_corrN  
2018\_Ag**

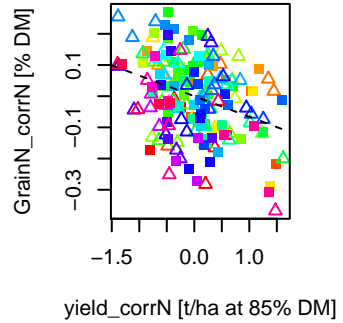

**GPD vs yield\_corrN  
2018\_Ag**

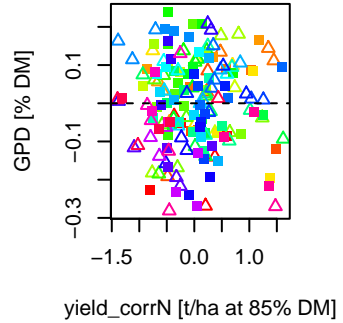

**GPD vs Grain\_corrN  
2018\_Ag**

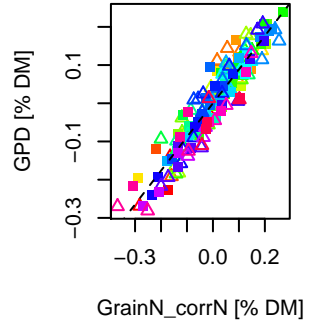

**2018\_Ag  
grainN\_corrN**



**2018\_Ag  
Yield\_corrN**



**2018\_Ag  
GPD**



**grainN vs yield  
2018\_Ds**

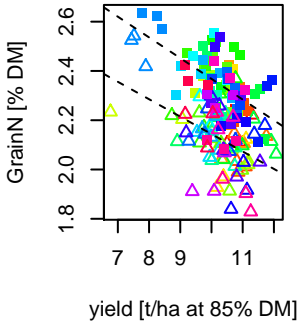

**grainN\_corrN vs yield\_corrN  
2018\_Ds**

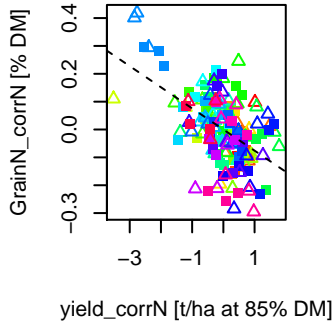

**GPD vs yield\_corrN  
2018\_Ds**

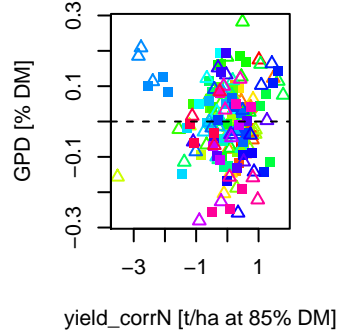

**GPD vs Grain\_corrN  
2018\_Ds**

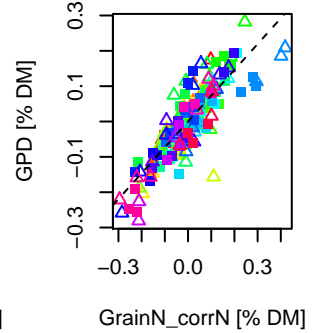

**2018\_Ds  
grainN\_corrN**



**2018\_Ds  
Yield\_corrN**



**2018\_Ds  
GPD**



**grainN vs yield  
2018\_Li**

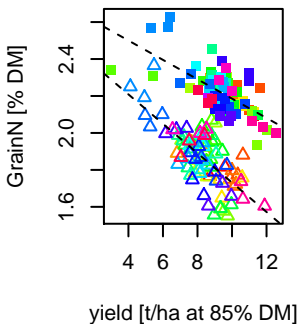

**grainN\_corrN vs yield\_corrN  
2018\_Li**

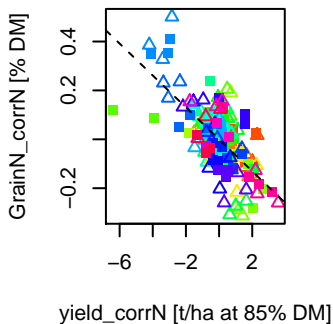

**GPD vs yield\_corrN  
2018\_Li**

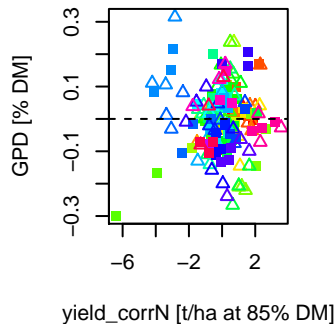

**GPD vs Grain\_corrN  
2018\_Li**

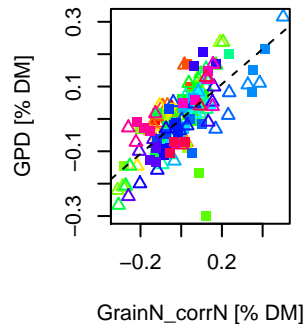

**2018\_Li  
grainN\_corrN**



**2018\_Li  
Yield\_corrN**



**2018\_Li  
GPD**

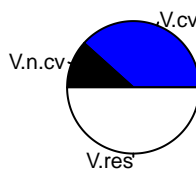

**grainN vs yield  
2018\_Ro**

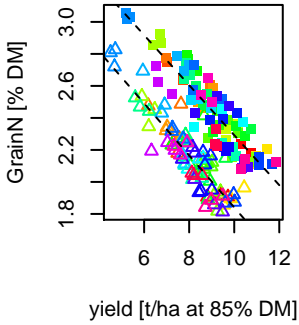

**grainN\_corrN vs yield\_corrN  
2018\_Ro**

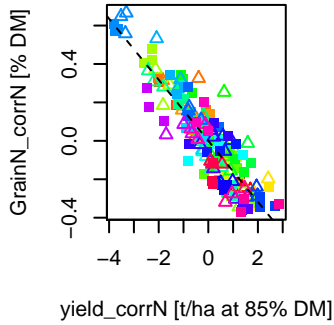

**GPD vs yield\_corrN  
2018\_Ro**

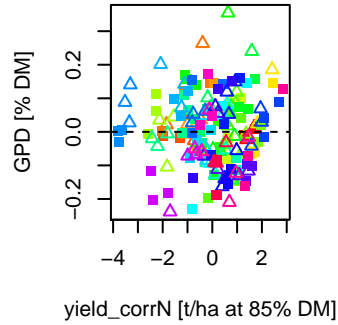

**GPD vs Grain\_corrN  
2018\_Ro**

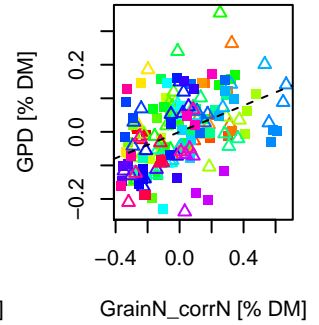

**2018\_Ro  
grainN\_corrN**



**2018\_Ro  
Yield\_corrN**



**2018\_Ro  
GPD**

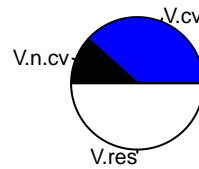

**grainN vs yield**  
**2018\_Sa**

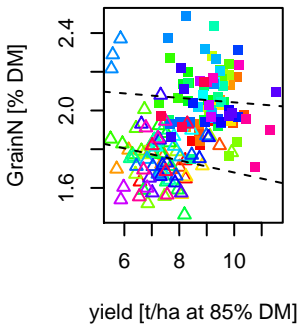

**grainN\_corrN vs yield\_corrN**  
**2018\_Sa**

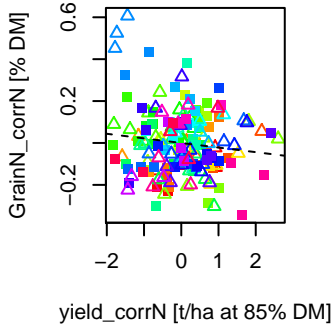

**GPD vs yield\_corrN**  
**2018\_Sa**

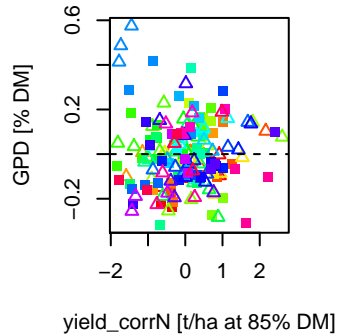

**GPD vs Grain\_corrN**  
**2018\_Sa**

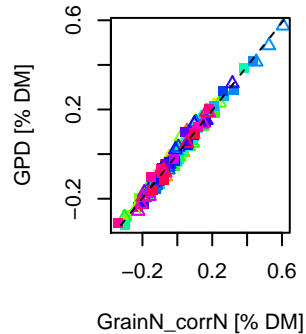

**2018\_Sa**  
**grainN\_corrN**



**2018\_Sa**  
**Yield\_corrN**



**2018\_Sa**  
**GPD**

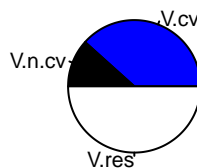

Supplement: mmc4.pdf [file mmc4.pdf]
