# Supplementary material for: Genetic variation and heritability of grain protein deviation in European wheat genotypes
Source: PubMed Central journal article supplement (PMC7397848; doi:10.1016/j.fcr.2020.107896), 2020-09-15
Supplement: mmc3.pdf [file mmc3.pdf]

grain%N vs yield  
2009\_Ro

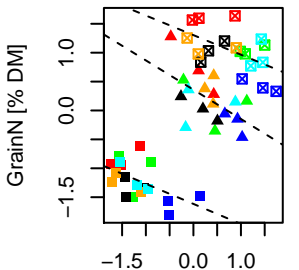

yield [t/ha at 85% DM]

grain%N\_corrN vs yield\_corrN  
2009\_Ro

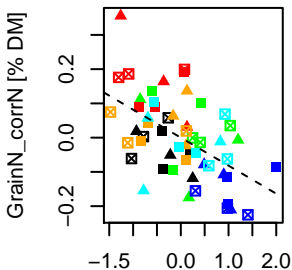

yield\_corrN [t/ha at 85% DM]

GPD vs yield\_corrN  
2009\_Ro

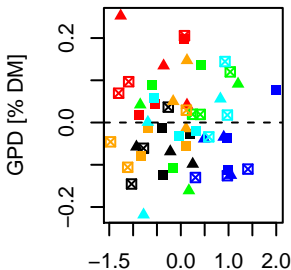

yield\_corrN [t/ha at 85% DM]

GPD vs grain%N\_corrN  
2009\_Ro

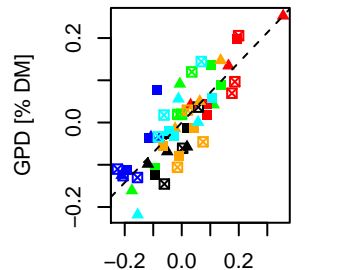

grain%N\_corrN [t/ha at 85% DM]

grain%N vs yield  
2010\_Kw

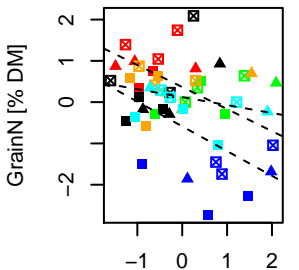

yield [t/ha at 85% DM]

grain%N\_corrN vs yield\_corrN  
2010\_Kw

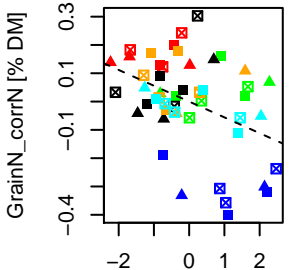

yield\_corrN [t/ha at 85% DM]

GPD vs yield\_corrN  
2010\_Kw

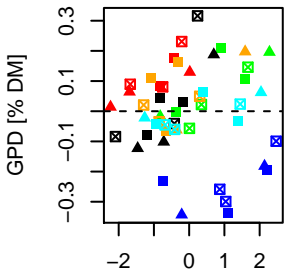

yield\_corrN [t/ha at 85% DM]

GPD vs grain%N\_corrN  
2010\_Kw

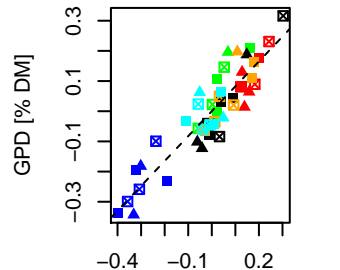

grain%N\_corrN [t/ha at 85% DM]

grain%N vs yield  
2010\_Li

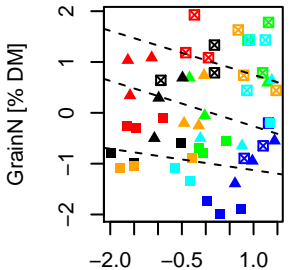

yield [t/ha at 85% DM]

grain%N\_corrN vs yield\_corrN  
2010\_Li

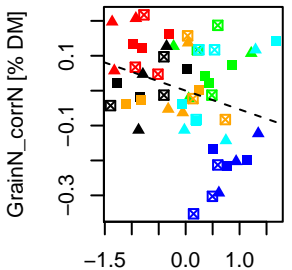

yield\_corrN [t/ha at 85% DM]

GPD vs yield\_corrN  
2010\_Li

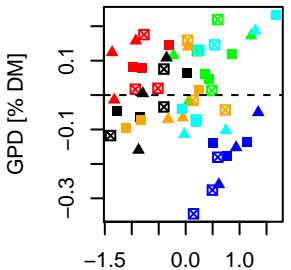

yield\_corrN [t/ha at 85% DM]

GPD vs grain%N\_corrN  
2010\_Li

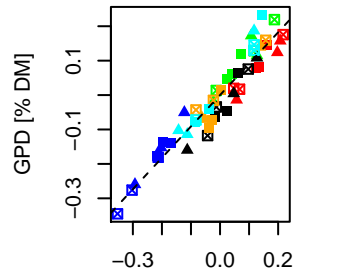

grain%N\_corrN [t/ha at 85% DM]

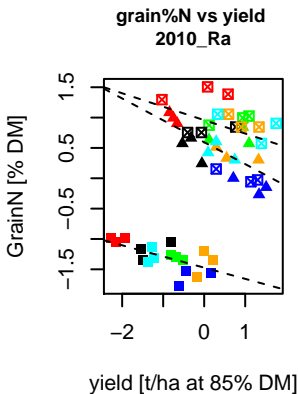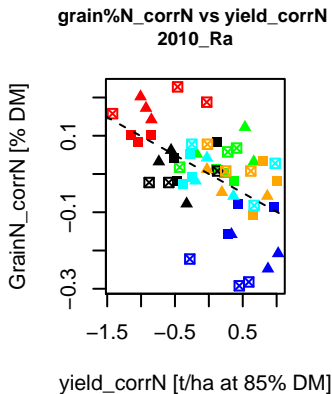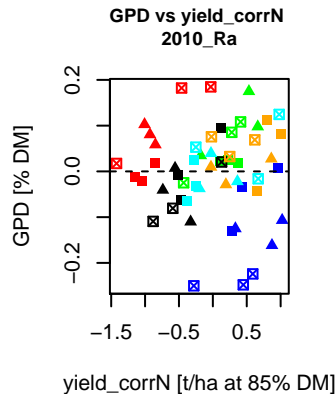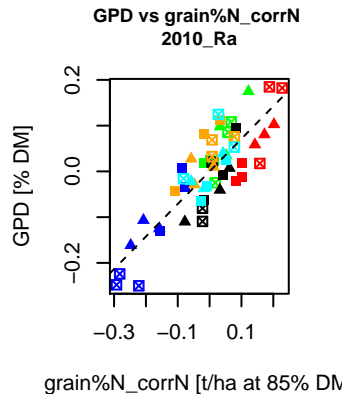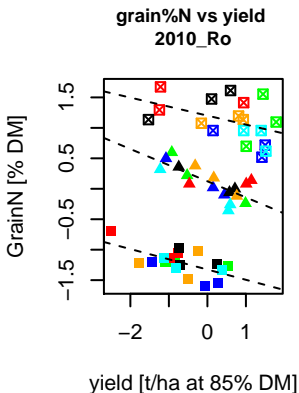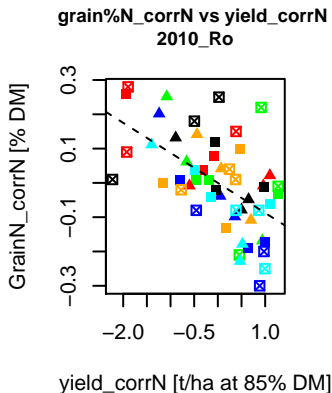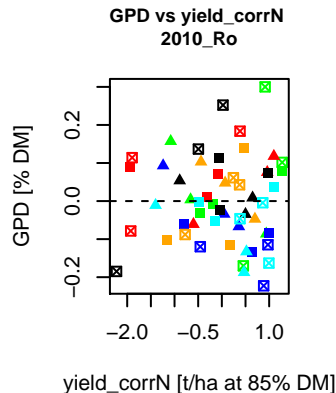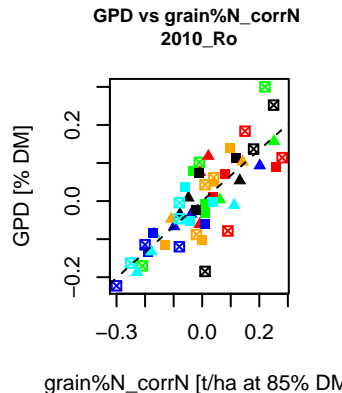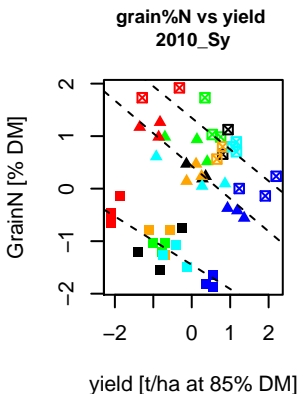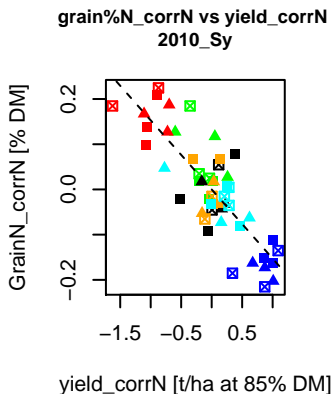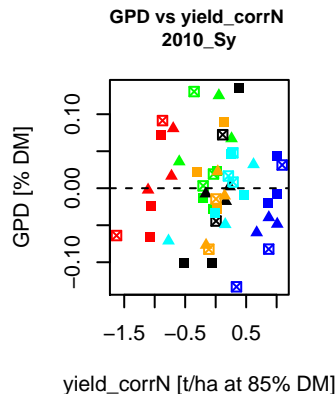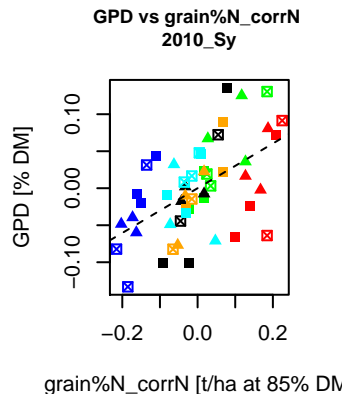

grain%N vs yield  
2011\_Kw

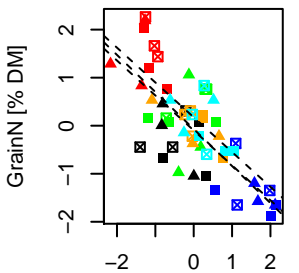

yield [t/ha at 85% DM]

grain%N\_corrN vs yield\_corrN  
2011\_Kw

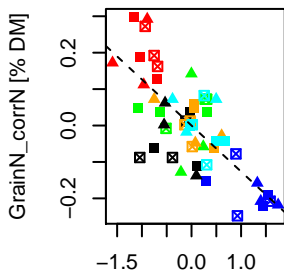

yield\_corrN [t/ha at 85% DM]

GPD vs yield\_corrN  
2011\_Kw

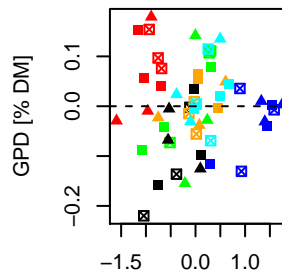

yield\_corrN [t/ha at 85% DM]

GPD vs grain%N\_corrN  
2011\_Kw

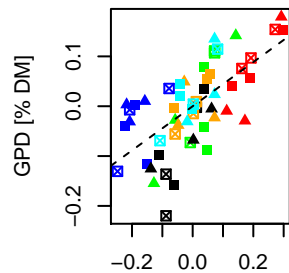

grain%N\_corrN [t/ha at 85% DM]

grain%N vs yield  
2011\_Li

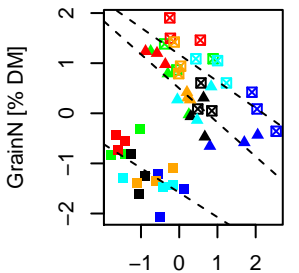

yield [t/ha at 85% DM]

grain%N\_corrN vs yield\_corrN  
2011\_Li

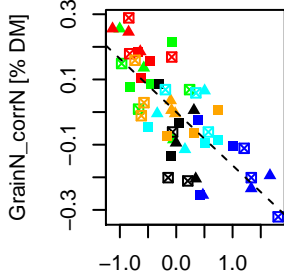

yield\_corrN [t/ha at 85% DM]

GPD vs yield\_corrN  
2011\_Li

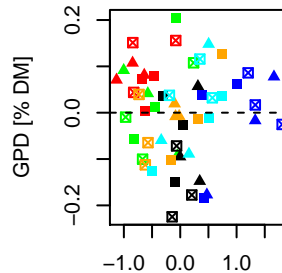

yield\_corrN [t/ha at 85% DM]

GPD vs grain%N\_corrN  
2011\_Li

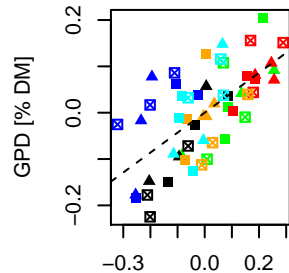

grain%N\_corrN [t/ha at 85% DM]

grain%N vs yield  
2011\_Ra

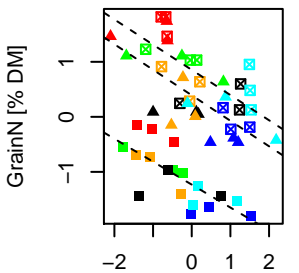

yield [t/ha at 85% DM]

grain%N\_corrN vs yield\_corrN  
2011\_Ra

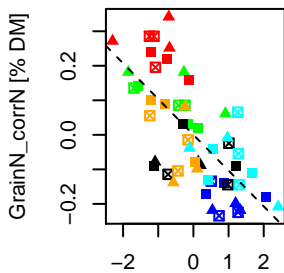

yield\_corrN [t/ha at 85% DM]

GPD vs yield\_corrN  
2011\_Ra

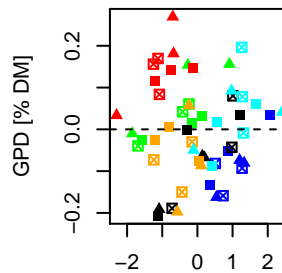

yield\_corrN [t/ha at 85% DM]

GPD vs grain%N\_corrN  
2011\_Ra

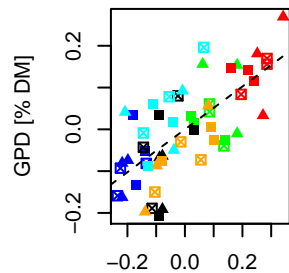

grain%N\_corrN [t/ha at 85% DM]

grain%N vs yield  
2011\_Ro

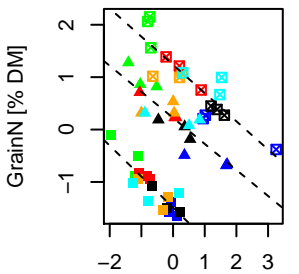

yield [t/ha at 85% DM]

grain%N\_corrN vs yield\_corrN  
2011\_Ro

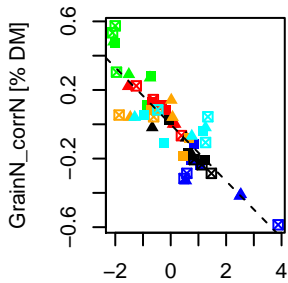

yield\_corrN [t/ha at 85% DM]

GPD vs yield\_corrN  
2011\_Ro

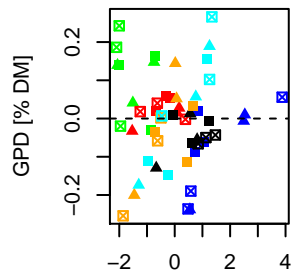

yield\_corrN [t/ha at 85% DM]

GPD vs grain%N\_corrN  
2011\_Ro

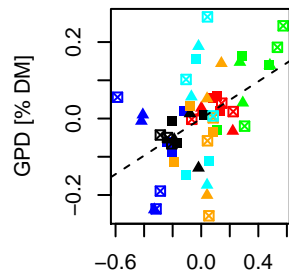

grain%N\_corrN [t/ha at 85% DM]

grain%N vs yield  
2011\_Sy

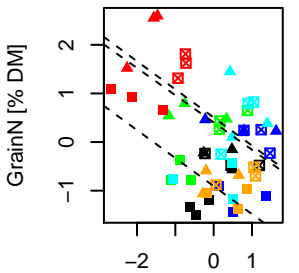

yield [t/ha at 85% DM]

grain%N\_corrN vs yield\_corrN  
2011\_Sy

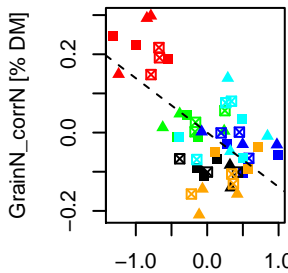

yield\_corrN [t/ha at 85% DM]

GPD vs yield\_corrN  
2011\_Sy

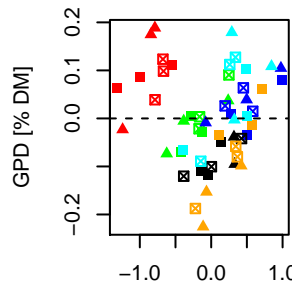

yield\_corrN [t/ha at 85% DM]

GPD vs grain%N\_corrN  
2011\_Sy

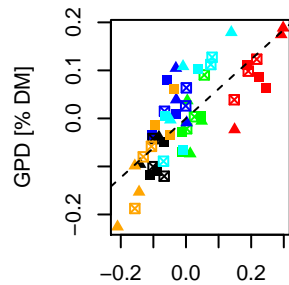

grain%N\_corrN [t/ha at 85% DM]
